# Supplementary material
Source: PubMed Central journal article supplement (PMC5189622)
Supplement: supp_the2016-0148_Supplemental_Table.pdf [file supp_the2016-0148_Supplemental_Table.pdf]

Supplemental Table for:  
Missed Detection of KRAS Mutations and Other Alterations Predicted to Confer Lack of Benefit from EGFR Antibody Therapy in Advanced Colorectal Cancer  
Alexa B. Schrock et al.

**Table S1.** Primary vs. metastatic biopsy site for CRC cases analyzed by CGP categorized by genomic alteration.

|                     | Primary | Metastasis | Total cases with data | % Metastatic |
|---------------------|---------|------------|-----------------------|--------------|
| NRAS amp            | 1       | 5          | 6                     | 83.3         |
| EGFR EC             | 2       | 8          | 10                    | 80.0         |
| HRAS amp            | 1       | 4          | 5                     | 80.0         |
| BRAF amp            | 1       | 3          | 4                     | 75.0         |
| ERBB2 EC            | 4       | 11         | 15                    | 73.3         |
| MEK1 mut            | 15      | 26         | 41                    | 63.4         |
| RTK rearr           | 6       | 9          | 15                    | 60.0         |
| HRAS mut            | 3       | 4          | 7                     | 57.1         |
| MET amp             | 17      | 22         | 39                    | 56.4         |
| KRAS amp            | 32      | 41         | 73                    | 56.2         |
| PTEN del            | 63      | 75         | 138                   | 54.3         |
| FLT3 amp            | 157     | 159        | 316                   | 50.3         |
| ERBB2 trunc         | 2       | 2          | 4                     | 50.0         |
| BRAF rearr          | 4       | 4          | 8                     | 50.0         |
| ERBB2 amp           | 68      | 66         | 134                   | 49.3         |
| BRAF non-V600 mut   | 47      | 41         | 88                    | 46.6         |
| NRAS mut            | 86      | 75         | 161                   | 46.6         |
| KRAS G12/13 mut     | 1042    | 880        | 1922                  | 45.8         |
| KRAS non-G12/13 mut | 154     | 120        | 274                   | 43.8         |
| PTEN trunc          | 85      | 65         | 150                   | 43.3         |
| PIK3CA mut          | 419     | 314        | 733                   | 42.8         |
| ERBB2 KD            | 43      | 25         | 68                    | 36.8         |
| BRAF V600 mut       | 153     | 77         | 230                   | 33.5         |
| ARAF mut            | 2       | 1          | 3                     | 33.3         |
| ARAF amp            | 3       | 0          | 3                     | 0.0          |
| RAS/RAF wild-type   | 851     | 792        | 1643                  | 48.2         |
| All cases           | 2334    | 2009       | 4343                  | 46.3         |

Mut: mutation; amp: amplification; del: deletion; trunc: truncation; WT: wild-type; EC: extracellular domain; KD: kinase domain.
